# Supplementary material for: Holey graphene synthesized by electrochemical exfoliation for high-performance flexible microsupercapacitors
Source: Royal Society of Chemistry journal article supplement (doi:10.1039/c9ta00792j), 2019-01-01
Supplement: c9ta00792j1.pdf [file c9ta00792j1.pdf]

## Supplementary Information

# Holey Graphene Synthesized by Electrochemical Exfoliation for High-Performance Flexible Micro-supercapacitors

*An-Kang Lu<sup>a</sup>, Han-Yu Li<sup>a\*</sup>, Yao Yu<sup>a, b\*</sup>*

<sup>a</sup> State Key Lab for Materials Processing and Die & Mould Technology, School of Materials Science and Engineering, Huazhong University of Science and Technology, Wuhan 430074, China

<sup>b</sup> Wuhan National High Magnetic Field Center and School of Physics, Huazhong University of Science and Technology, Wuhan 430074, China

\* Corresponding authors:

E-mail: [lihanyu89@163.com](mailto:lihanyu89@163.com), [ensiyu@mail.hust.edu.cn](mailto:ensiyu@mail.hust.edu.cn)

## 1. Gas detection experiment

50ml gases were collected by a syringe and was detected by a Thermal Conductivity Detector (TCD), the result is shown in **Fig. S1**. Gases including H<sub>2</sub>, CO<sub>2</sub>, O<sub>2</sub>, CO are detected. Further, the gases were guided into the potassium permanganate solution for 2 h. The color of potassium permanganate solution gradually fades (**Fig. S2**), revealing the existence of SO<sub>2</sub>.

## 2. BET experiment

The N<sub>2</sub> adsorption–desorption isotherms of the FHG were recorded at 77 K using an ASiQWin (Quantachrome), and the specific area was calculated by the Brunauer–Ennett–Teller (BET) method with a multi-molecular layer adsorption model. The BET area and

the total pore volume of the FHG were determined to be  $42.4 \text{ m}^2 \text{ g}^{-1}$  and  $0.12 \text{ cm}^3 \text{ g}^{-1}$  by the nitrogen adsorption-desorption isotherm plot, respectively (**Fig. S6a**), and the pore-size distribution curve (**Fig. S6b**) shows a sharp peak at 2.2 nm.

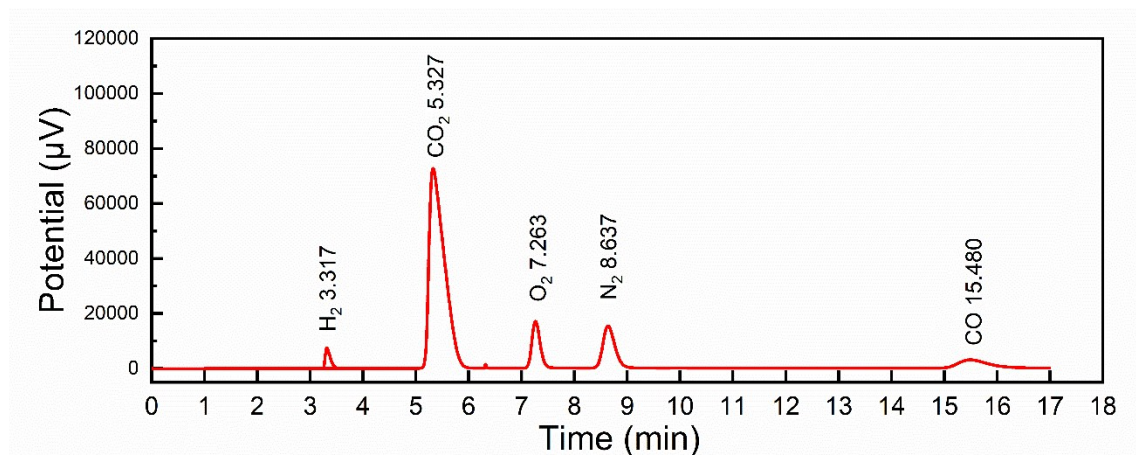

**Fig. S1.** TCD spectra of the gases generated in the exfoliation process.

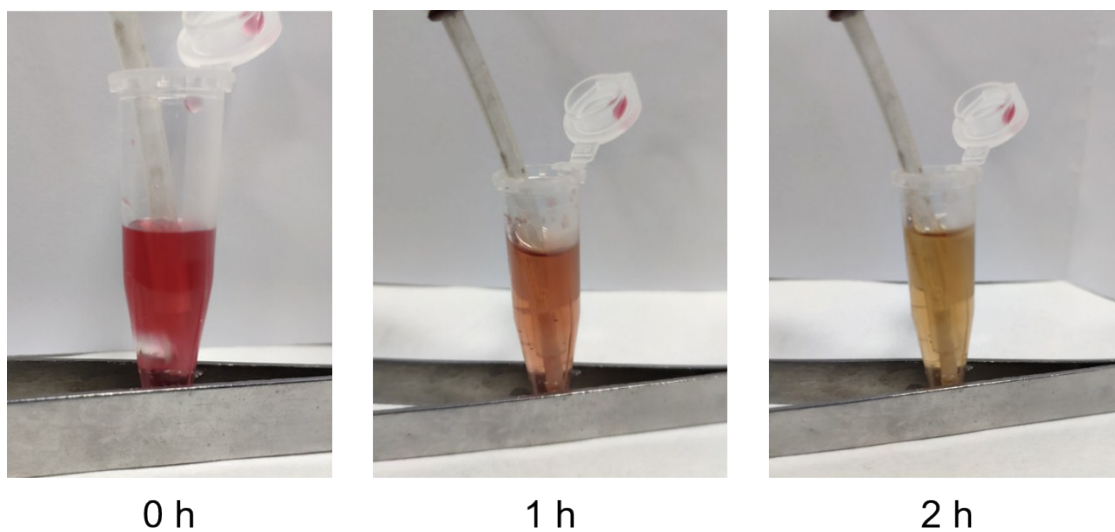

**Fig. S2.** The color of potassium permanganate solution changes with the ventilation time.

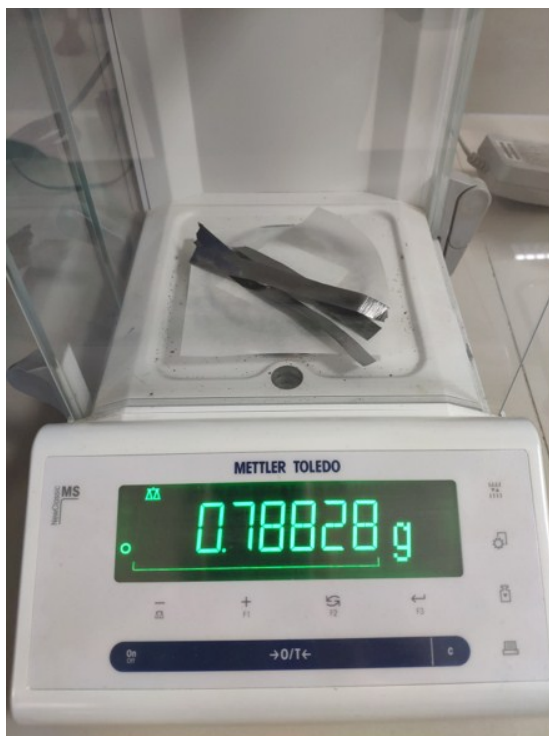

Before exfoliation

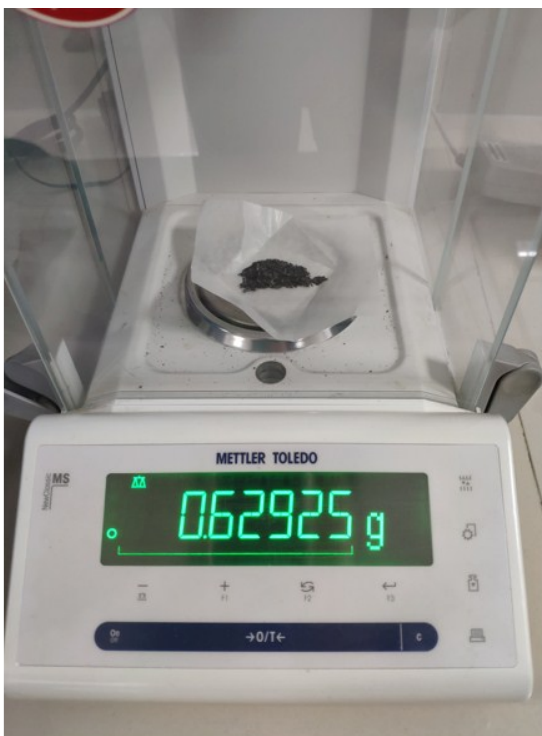

After exfoliation

**Fig. S3.** The total weight of the initial graphite foil (788mg), and the weight of obtained FHG powder (629mg).

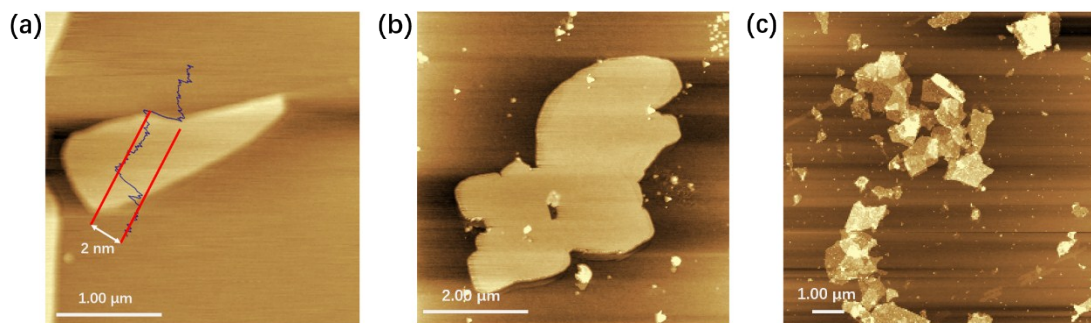

**Fig. S4.** AFM images of FHG nanosheets.

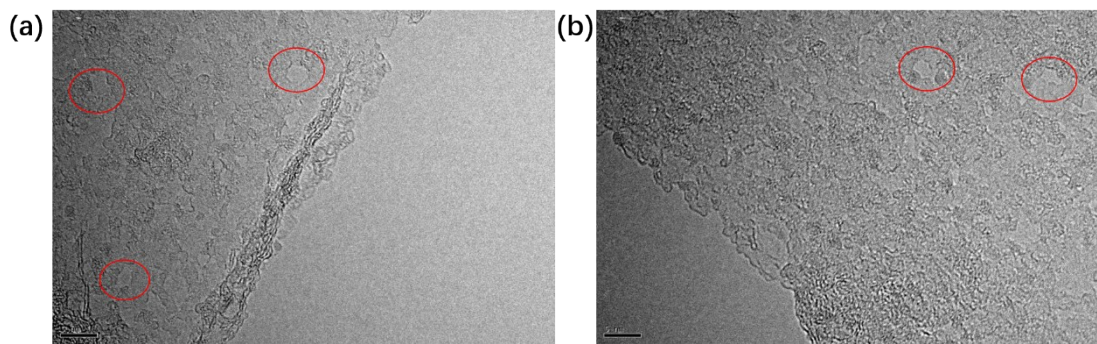

**Fig. S5.** HRTEM images of FHG nanosheets. The red circles mark the holes.

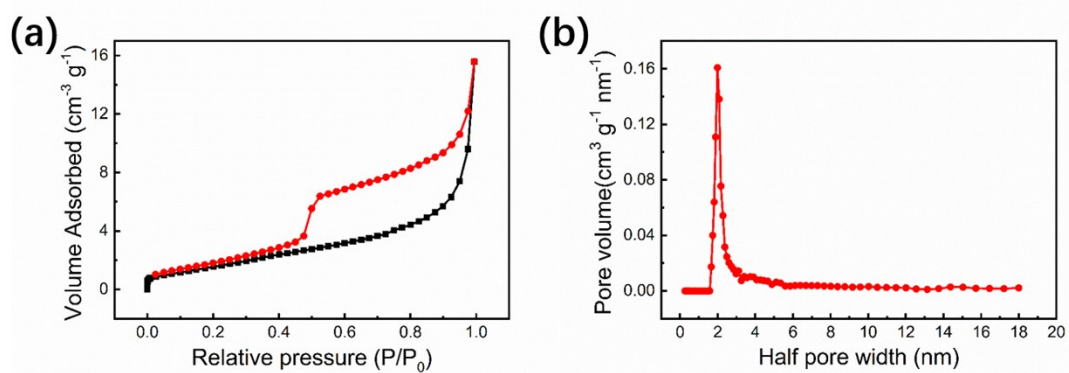

**Fig. S6.** (a)  $N_2$  adsorption–desorption isotherms and (b) pore size distribution of FHG film.

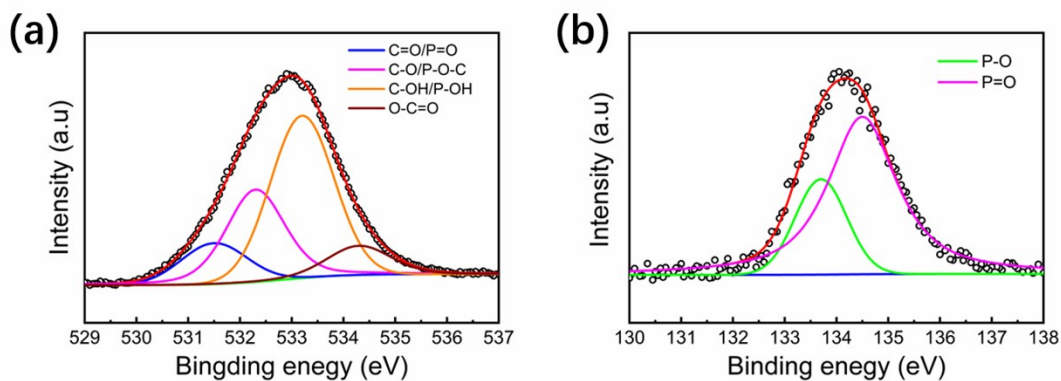

**Fig. S7.** (a) XPS  $O1s$  spectra and (b)  $P2p$  spectra of FHG-2 film.



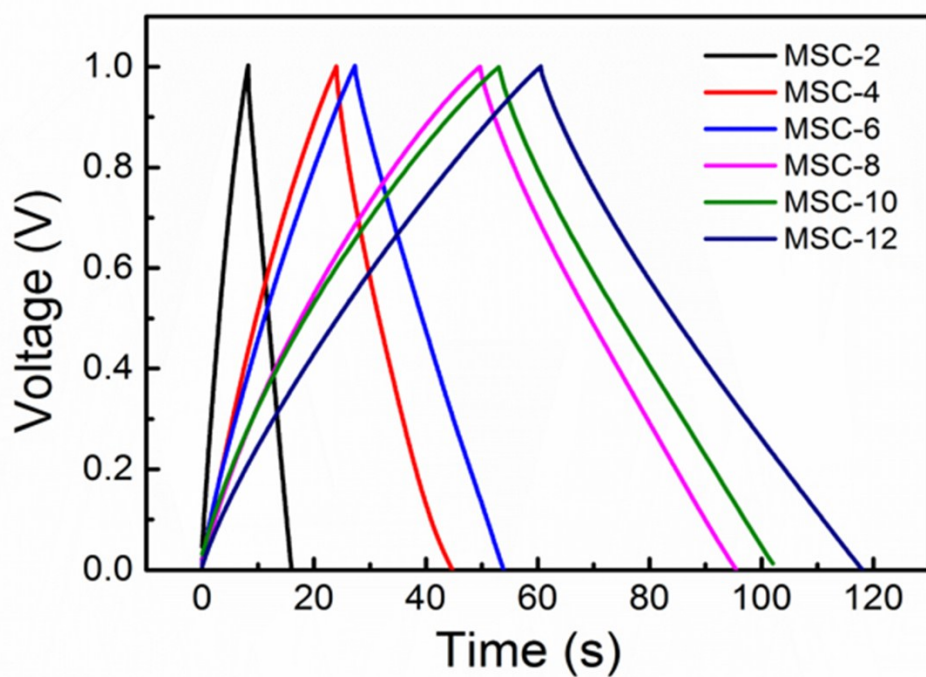

**Fig. S8.** GCD curves of different thickness of MSCs at current density of 0.1 mA cm<sup>-2</sup>.

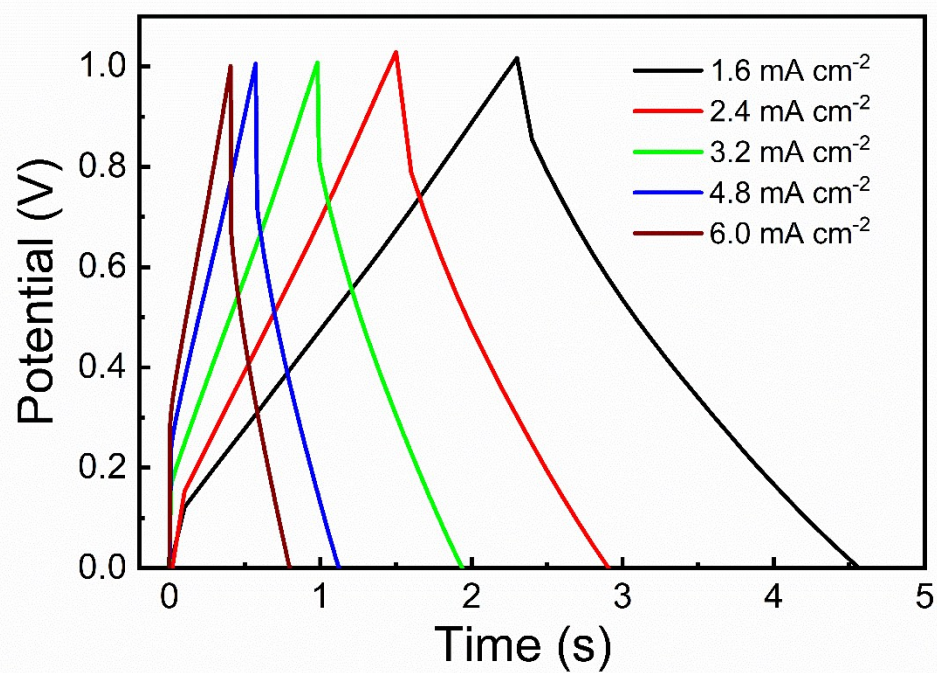

**Fig. S9.** GCD curves of MSC-12 at current densities ranging from 1.6 mA cm<sup>-2</sup> to 6 mA cm<sup>-2</sup>
